# Supplementary material for: Ultra simple catalyst layer preparation for the growth of vertically aligned CNTs and CNT-based nanostructures
Source: Royal Society of Chemistry journal article supplement (doi:10.1039/c1ce06130e), 2011-11-07
Supplement: c1ce06130e.pdf [file c1ce06130e.pdf]

## Online Supplementary Information

---

### **Ultra simple catalyst layer preparation for the growth of vertically aligned CNTs and CNTs-based nanostructures**

Ricardo M. Silva,<sup>a</sup> Andrea Pucci,<sup>a</sup> Catherine Marichy,<sup>a</sup> Diogo Mata,<sup>b</sup> Marta C. Ferro,<sup>b</sup>  
Rui F. Silva,<sup>b</sup> Nicola Pinna<sup>\*,a,c</sup>

<sup>a</sup> *Department of Chemistry, CICECO, University of Aveiro, 3810-193 Aveiro, Portugal.*

*E-mail: pinna@ua.pt*

<sup>b</sup> *Department of Ceramics and Glass Engineering, CICECO, University of Aveiro, 3810-193 Aveiro, Portugal*

<sup>c</sup> *World Class University (WCU) program of Chemical Convergence for Energy and Environment (C2E2), School of Chemical and Biological Engineering, College of Engineering, Seoul National University (SNU), Seoul, 151-744, Korea.*

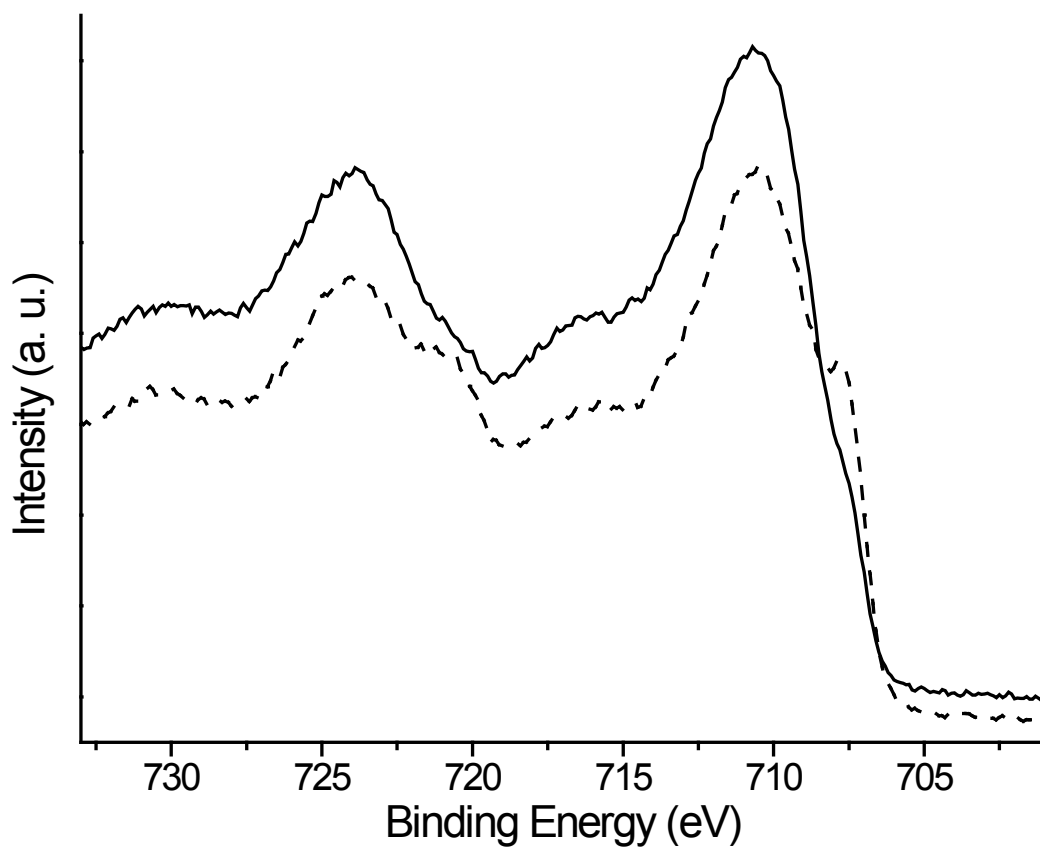

**Fig. S11** Fe2p XPS spectra of iron oxide deposited on Al<sub>2</sub>O<sub>3</sub>/SiO<sub>2</sub>/Si (dashed line) and SiO<sub>2</sub>/Si (full line) wafers

### High resolution version of the SEM, AFM and TEM figures of the manuscript

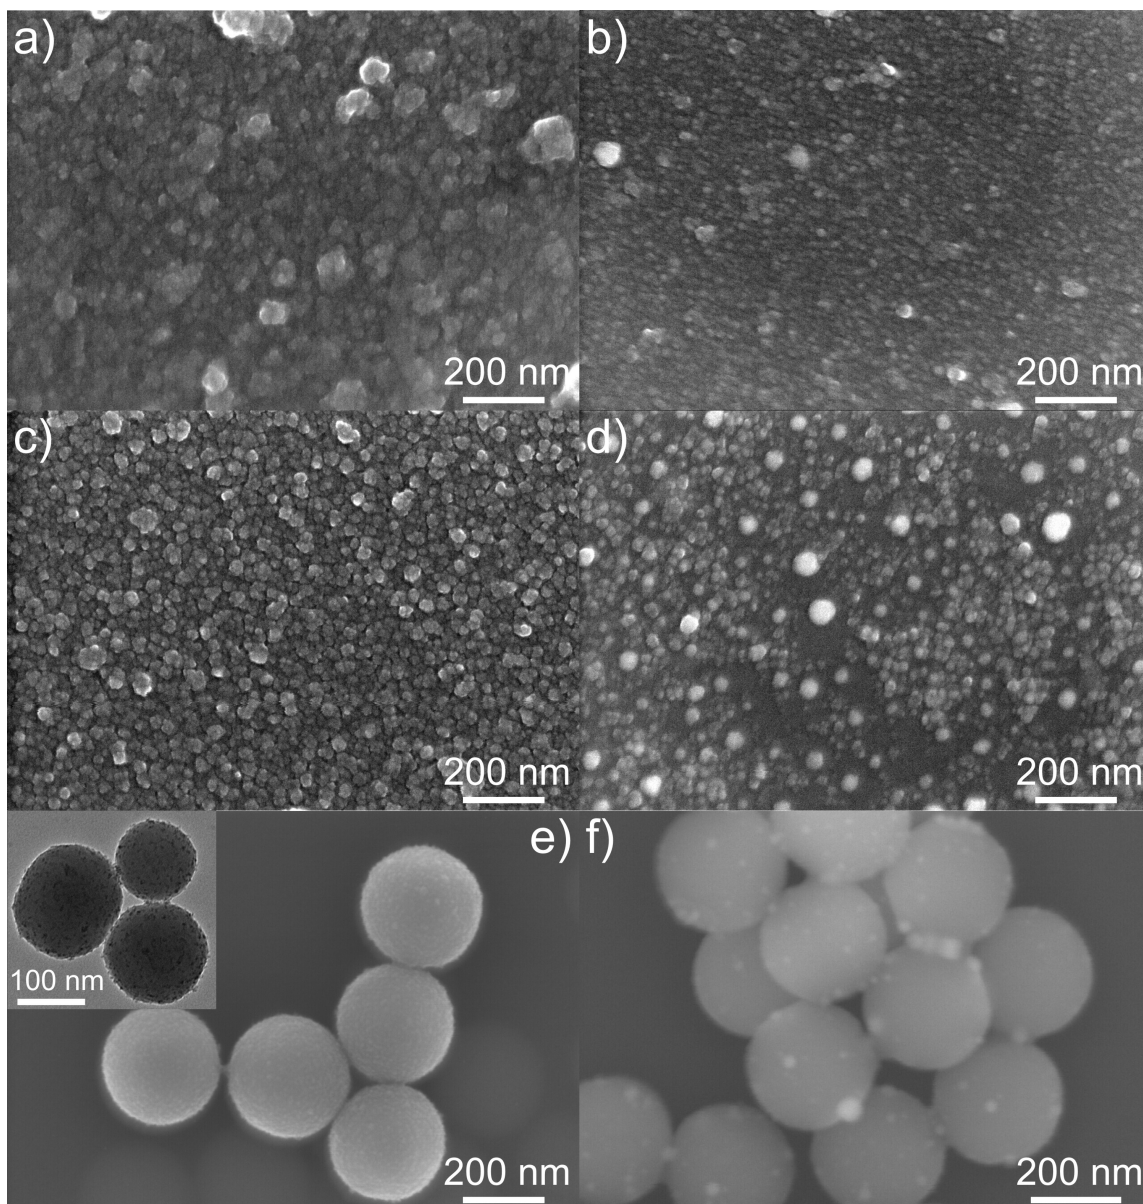

**Fig. 1** SEM images after iron oxide deposition (a,c,e) and after the annealing treatment (b,d,e) for Al<sub>2</sub>O<sub>3</sub>/SiO<sub>2</sub>/Si, SiO<sub>2</sub>/Si wafers and silica spheres, respectively. Inset of e) TEM image of iron oxide coated silica spheres

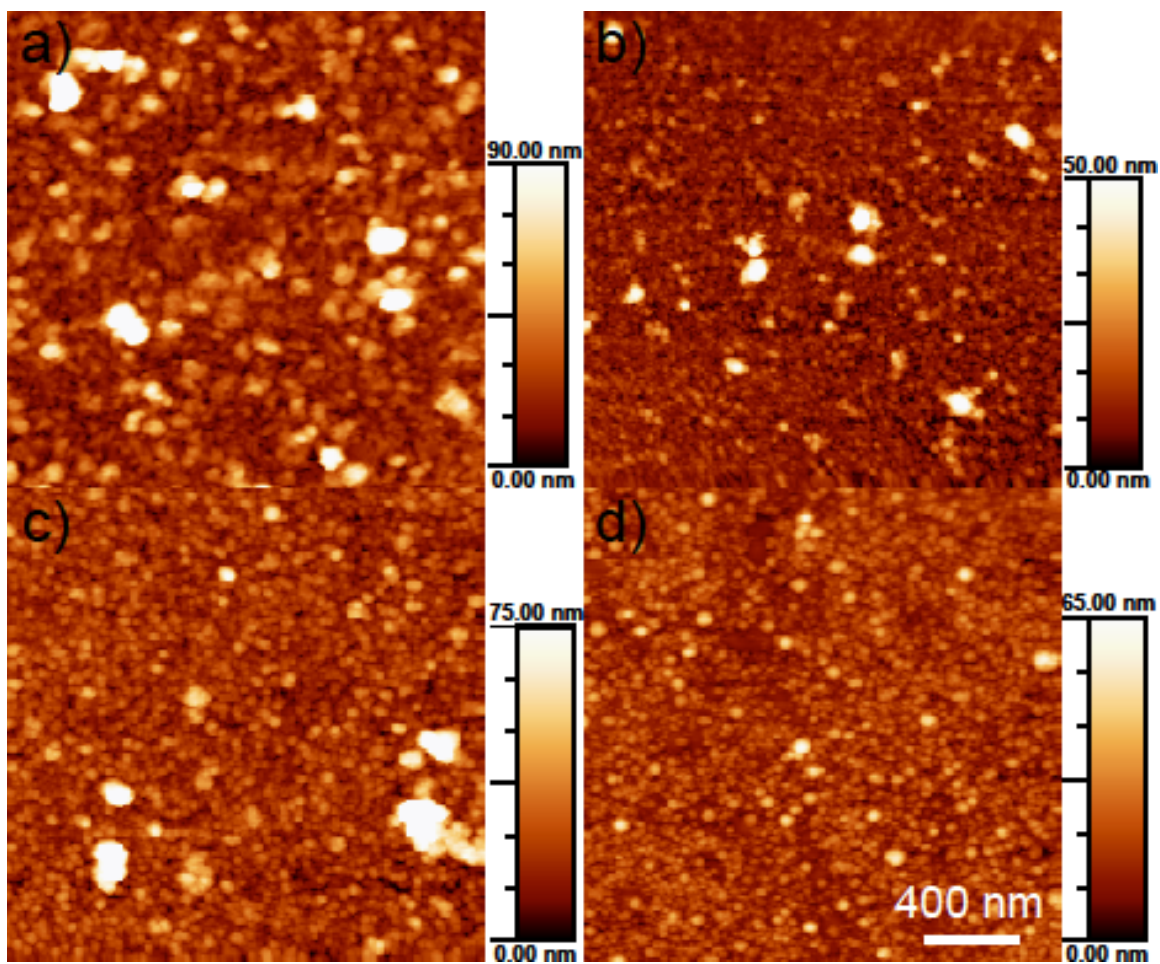

**Fig. 2** AFM images after iron oxide deposition (a,c) and after the annealing treatment (b,d) for  $\text{Al}_2\text{O}_3/\text{SiO}_2/\text{Si}$  and  $\text{SiO}_2/\text{Si}$  wafers, respectively



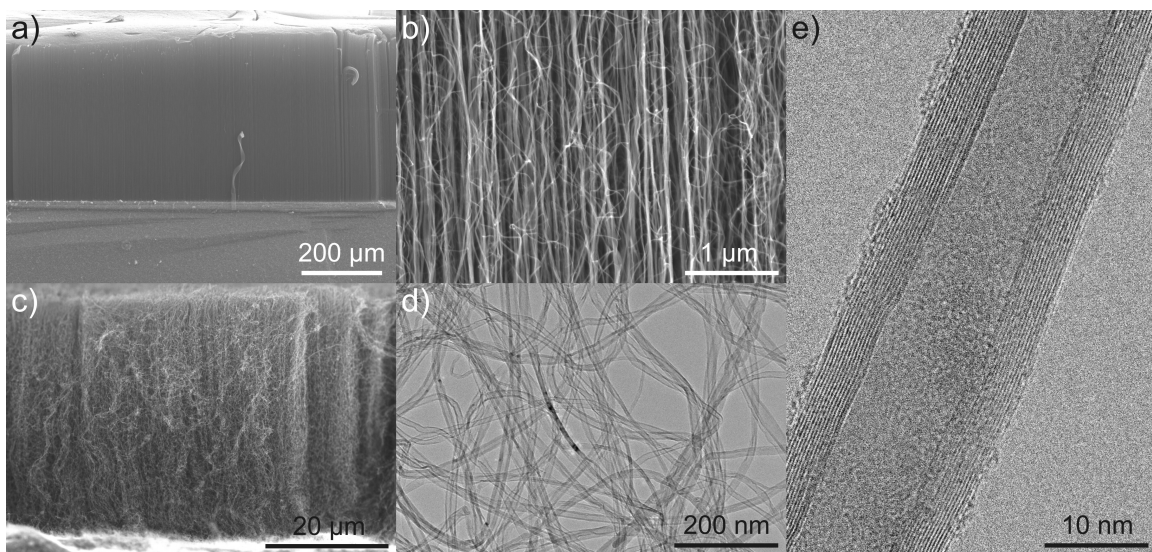

**Fig. 3** SEM images of nanotubes grown on Al<sub>2</sub>O<sub>3</sub>/SiO<sub>2</sub>/Si (a,b). SEM, TEM and HRTEM images of nanotubes grown on SiO<sub>2</sub>/Si (c,d,e)

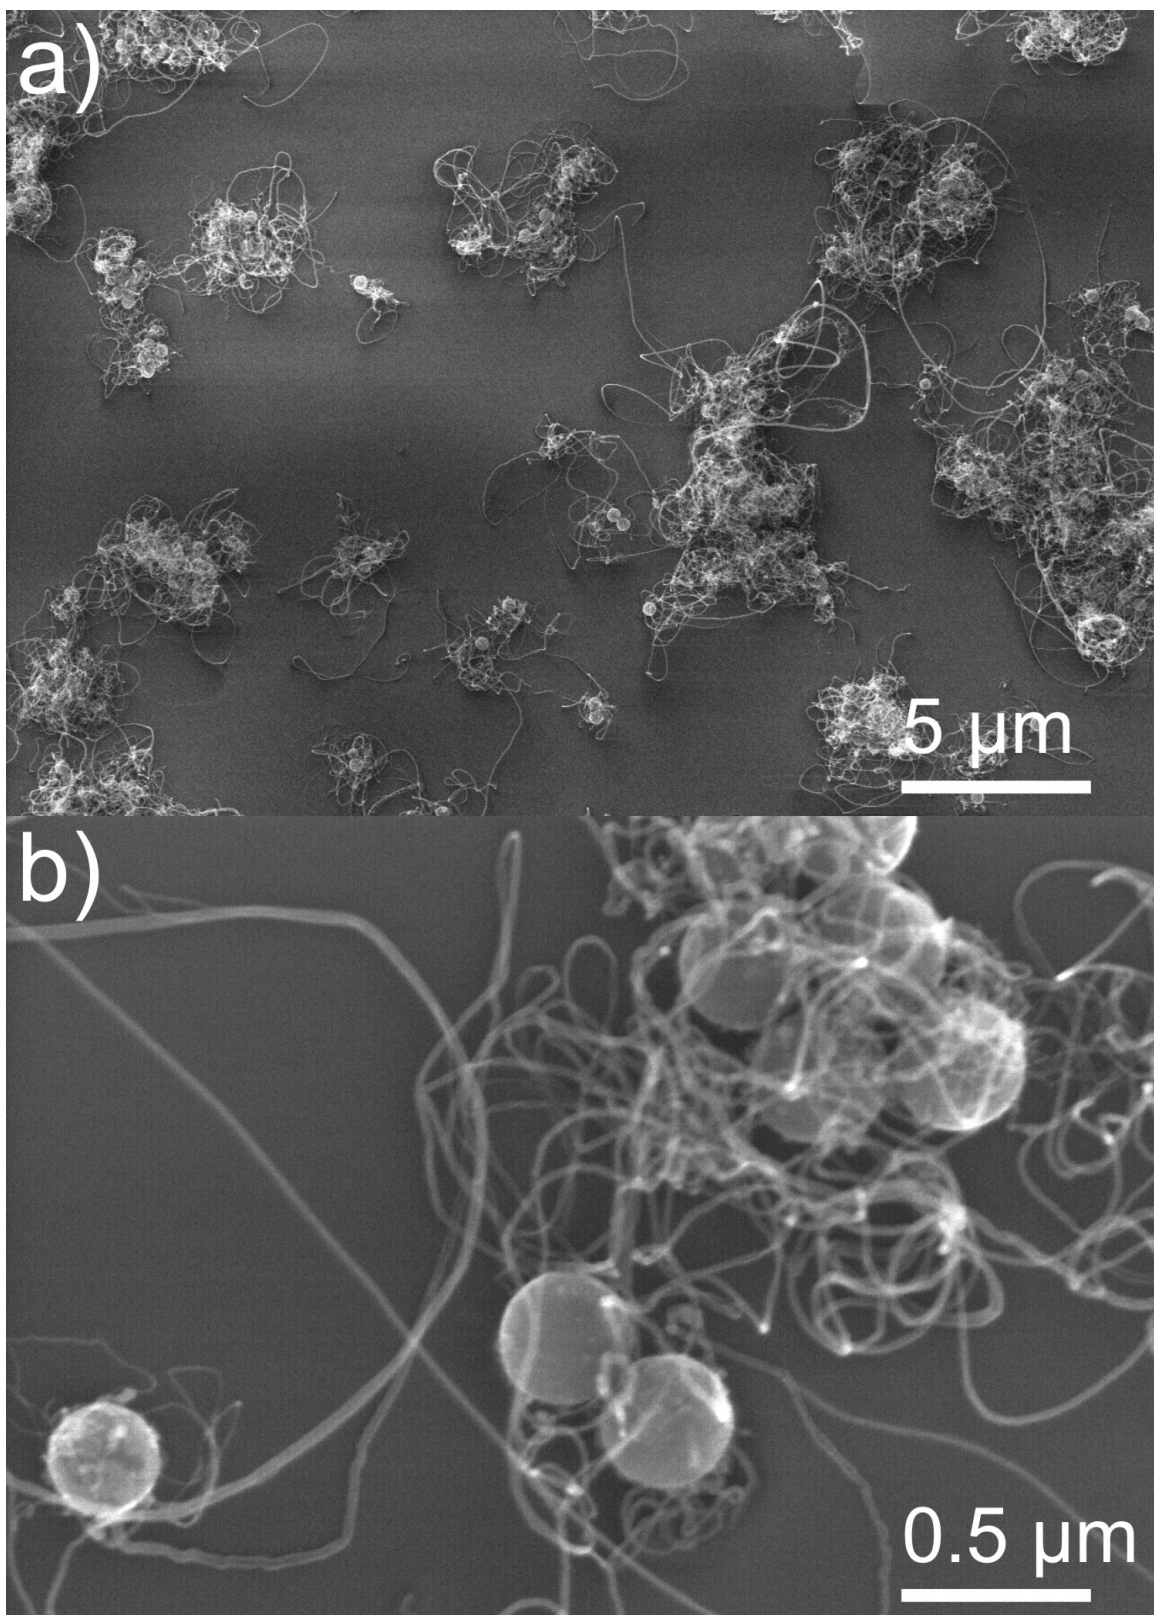

**Fig. 5** SEM images of CNTs grown onto SiO<sub>2</sub> spheres for 10 (a) and 30 s (b)
